# Supplementary material for: Reconstructing Holocene temperature and salinity variations in the western Baltic Sea region: a multi-proxy comparison from the Little Belt (IODP Expedition 347, Site M0059)
Source: Copernicus journal article supplement (doi:10.5194/bg-14-5607-2017), 2017-12-12
Supplement: Supplementary file 1 [file bg-14-5607-2017-supplement.zip]

Kotthoff et al. 2017 supplements

**Table S6: List of samples used for clumped-isotope-composition based temperature reconstructions**

| Sample ID     | MCD    | D47 Temperature | 1 SE        | Age  | Species                                       |
|---------------|--------|-----------------|-------------|------|-----------------------------------------------|
| 59A197-99     | 1.180  | 7.725598793     | 2.697792542 | 136  | <i>Abra alba</i>                              |
| 59D374-77     | 7.340  | 4.825280875     | 1.786217744 | 1101 | <i>Arctica islandica</i>                      |
| 59D648.5-50.5 | 15.480 | 2.135648415     | 2.629144758 | 2796 | <i>Abra alba</i> and <i>Corbula gibba</i>     |
| 59A898-100-1  | 25.310 | 8.784047652     | 2.002951053 | 4469 | <i>Arctica islandica</i>                      |
| 59D897-99     | 29.57  | 8.197471072     | 2.327222591 | 5166 | <i>Abra alba</i>                              |
| 59D1218-20    | 34.98  | 7.488392432     | 1.967369452 | 5798 | <i>Abra alba</i> and <i>corbula gibba</i>     |
| 59D1269-71    | 35.49  | 5.058306262     | 1.537959278 | 5896 | <i>Arctica islandica</i> and <i>Abra alba</i> |
| 59A1198-100   | 35.630 | 11.7603554      | 1.966986677 | 5917 | <i>Macoma balthica</i>                        |
| 59A1215-18    | 38.1   | 7.601885766     | 1.3491958   | 6295 | <i>Arctica islandica</i>                      |
| 59A1343-45    | 41.68  | 11.7703884      | 0.312875701 | 6835 | <i>Arctica islandica</i>                      |
| 59A1351.5-55  | 41.77  | 9.443172291     | 1.234234998 | 6842 | <i>Macoma balthica</i>                        |
