# Supplementary material for: Reconstructing Holocene temperature and salinity variations in the western Baltic Sea region: a multi-proxy comparison from the Little Belt (IODP Expedition 347, Site M0059)
Source: Copernicus journal article supplement (doi:10.5194/bg-14-5607-2017), 2017-12-12
Supplement: Supplementary file 2 [file bg-14-5607-2017-supplement.zip]

Kotthoff et al. 2017 supplements

Table S1: AMS radiocarbon dates from Expedition 347, Site M0059

Calibrated, 2 sigma age range

| Laboratory ID<br>(LuSNo) | Site  | Hole | Core | Section          | Top  | Bottom | Half | mbsf<br>top | mcd top      | mcd<br>middle | Material dated                   | 14C Age | error | Calibrated<br>age (median) | min  | max  |
|--------------------------|-------|------|------|------------------|------|--------|------|-------------|--------------|---------------|----------------------------------|---------|-------|----------------------------|------|------|
|                          |       |      |      |                  |      |        |      | 0.00        | <b>0.00</b>  |               |                                  |         |       | -63                        |      |      |
| 11289                    | M0059 | A    | 1    | 2                | 112  | 113    | W    | 2.63        | <b>2.84</b>  | 2.84          | molluscs, <i>Abra alba</i>       | 700     | 35    | 405                        | 297  | 513  |
| 11476                    | M0059 | A    | 2    | 2                | 27   | 29     | W    | 5.07        | <b>4.96</b>  | 4.97          | molluscs, <i>Abra alba</i>       | 1265    | 35    | 899                        | 755  | 1043 |
| 11291                    | M0059 | E    | 3    | 2                | 32   | 33     | W    | 8.42        | <b>8.79</b>  | 8.79          | molluscs, <i>Abra alba</i>       | 1585    | 35    | 1213                       | 1083 | 1348 |
| 11292                    | M0059 | A    | 4    | 13.55-13.60 mbsf |      |        | CC   | 13.55       | <b>14.22</b> | 14.24         | molluscs, <i>Macoma balthica</i> | 2740    | 40    | 2556                       | 2383 | 2729 |
| 11477                    | M0059 | D    | 7    | 2                | 133  | 135    | W    | 21.13       | <b>21.13</b> | 21.14         | molluscs, <i>Macoma balthica</i> | 3780    | 35    | 3829                       | 3645 | 4013 |
| 11295                    | M0059 | D    | 8    | 2                | 39   | 40     | W    | 23.49       | <b>23.49</b> | 23.49         | molluscs, <i>Macoma balthica</i> | 4035    | 40    | 4187                       | 3993 | 4381 |
| 11479                    | M0059 | A    | 8    | 2                | 76   | 78     | W    | 25.66       | <b>26.59</b> | 26.60         | molluscs, <i>Macoma balthica</i> | 4395    | 40    | 4664                       | 4500 | 4827 |
| 11297                    | M0059 | A    | 8    | 2                | 120  | 121    | W    | 26.10       | <b>27.03</b> | 27.03         | molluscs, <i>Macoma balthica</i> | 4500    | 40    | 4785                       | 4598 | 4971 |
| 11480                    | M0059 | D    | 9    | 3                | 29   | 31     | W    | 28.19       | <b>28.19</b> | 28.20         | molluscs, <i>Macoma balthica</i> | 4540    | 40    | 4845                       | 4654 | 5036 |
| 11300                    | M0059 | A    | 9    | 1                | 132  | 134    | W    | 28.02       | <b>29.50</b> | 29.51         | molluscs, <i>Macoma balthica</i> | 4780    | 40    | 5147                       | 4949 | 5345 |
| 11481                    | M0059 | D    | 11   | 1                | 28.5 | 30.5   | W    | 31.79       | <b>31.79</b> | 31.80         | molluscs, <i>Macoma balthica</i> | 4890    | 40    | 5313                       | 5118 | 5507 |
| 11482                    | M0059 | D    | 11   | 2                | 104  | 106    | W    | 34.04       | <b>34.04</b> | 34.05         | molluscs, <i>Abra alba</i>       | 5155    | 40    | 5603                       | 5457 | 5748 |
| 11301                    | M0059 | A    | 11   | 2                | 3    | 5      | W    | 34.03       | <b>35.38</b> | 35.39         | molluscs, <i>Abra alba</i>       | 5415    | 40    | 5885                       | 5713 | 6057 |
| 11483                    | M0059 | D    | 12   | 3                | 23   | 25     | W    | 38.03       | <b>38.03</b> | 38.04         | molluscs, <i>Abra alba</i>       | 5770    | 40    | 6289                       | 6152 | 6426 |
| 11303                    | M0059 | D    | 13   | 2                | 15   | 16     | W    | 39.75       | <b>39.75</b> | 39.75         | molluscs, <i>Macoma balthica</i> | 6130    | 40    | 6662                       | 6494 | 6829 |
| 11304                    | M0059 | A    | 15   | 1                | 49   | 51     | W    | 46.99       | <b>48.63</b> | 48.64         | mollusc fragments, bivalve       | 6845    | 45    | 7437                       | 7311 | 7562 |
