# Supplementary material for: Reconstructing Holocene temperature and salinity variations in the western Baltic Sea region: a multi-proxy comparison from the Little Belt (IODP Expedition 347, Site M0059)
Source: Copernicus journal article supplement (doi:10.5194/bg-14-5607-2017), 2017-12-12
Supplement: Supplementary file 3 [file bg-14-5607-2017-supplement.zip]

### Supplement Table S3 Kotthoff et al.

Trace metal/calcium in benthic foraminifera

Table S3. Average trace metal/Ca results for *E. selseyense* and *E. incertum* using three different cleaning methods.

| Species                           | No. of samples | Method                 | Mg/Ca (mmol/mol) | Mn/Ca (mmol/mol) | Fe/Ca (mmol/mol) |
|-----------------------------------|----------------|------------------------|------------------|------------------|------------------|
| <i>E. selseyense</i>              | 28             | Oxidation <sup>1</sup> | 2.76             | 14.81            | 1.05             |
| <i>E. selseyense</i> <sup>2</sup> | 19             | Red-Oxi <sup>3</sup>   | 2.35             | 16.72            | 1.10             |
| <i>E. selseyense</i> <sup>2</sup> | 41             | Oxi-Red                | 1.52             | 10.09            | 1.07             |
| <i>E. incertum</i>                | 4              | Oxidation <sup>1</sup> | 2.69             | 13.98            | n.a.             |
| <i>E. incertum</i>                | 10             | Red-Oxi <sup>3</sup>   | 1.71             | 12.62            | 1.03             |
| <i>E. incertum</i>                | 10             | Oxi-Red                | 1.53             | 15.81            | 1.27             |

<sup>1</sup>Barker et al. (2003)

<sup>2</sup>Some samples were a mixture of both *E. selseyense* and *E. incertum* due to low number of specimens.

<sup>3</sup>Martin and Lea (2002)

Barker, S., Greaves, M., Elderfield, H.: A study of cleaning procedures used for foraminiferal

Mg/Ca paleothermometry. *Geochem., Geophys., Geosys.*, 4, doi:10.1029/2003GC000559, 2003.

Martin, P.A., Lea, D.W.: simple evaluation of cleaning procedures on fossil benthic foraminiferal

Mg/Ca. *Geochem., Geophys., Geosys.* 3. 1-8. Doi:10.1029/2001GC000280, 2002.
