# Supplementary material for: Reconstructing Holocene temperature and salinity variations in the western Baltic Sea region: a multi-proxy comparison from the Little Belt (IODP Expedition 347, Site M0059)
Source: Copernicus journal article supplement (doi:10.5194/bg-14-5607-2017), 2017-12-12
Supplement: Supplementary file 4 [file bg-14-5607-2017-supplement.zip]

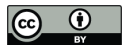

## *Supplement of*

# **Reconstructing Holocene temperature and salinity variations in the western Baltic Sea region: a multi-proxy comparison from the Little Belt (IODP Expedition 347, Site M0059)**

**U. Kotthoff et al.**

*Correspondence to:* Ulrich Kotthoff ([ulrich.kotthoff@uni-hamburg.de](mailto:ulrich.kotthoff@uni-hamburg.de))

- [bg-14-5607-2017-supplement-title-page.pdf](#)
- [Kotthoff&al\\_Supplement](#)
  - [Kotthoff&al\\_Supplement\\_Fig\\_S1.pdf](#)
  - [Kotthoff&al\\_Supplement\\_Table\\_S1.pdf](#)
  - [Kotthoff&al\\_Supplement\\_Table\\_S2.pdf](#)
  - [Kotthoff&al\\_Supplement\\_Table\\_S3.pdf](#)
  - [Kotthoff&al\\_Supplement\\_Table\\_S4.pdf](#)
  - [Kotthoff&al\\_Supplement\\_Table\\_S5.pdf](#)
  - [Kotthoff&al\\_Supplement\\_Table\\_S6.pdf](#)

The copyright of individual parts of the supplement might differ from the CC BY 3.0 License.
