# Supplementary material for: Reconstructing Holocene temperature and salinity variations in the western Baltic Sea region: a multi-proxy comparison from the Little Belt (IODP Expedition 347, Site M0059)
Source: Copernicus journal article supplement (doi:10.5194/bg-14-5607-2017), 2017-12-12
Supplement: Supplementary file 7 [file bg-14-5607-2017-supplement.zip]

Kotthoff et al. 2017 supplements

Table S1: AMS radiocarbon dates from Expedition 347, Site M0059

| Laboratory ID<br>(LuSNo) | Site  | Hole | Core | Section          | Top  | Bottom | Half | mbsf<br>top | mcd top      | mcd<br>middle | Material dated                   | 14C Age | error | Calibrated, 2 sigma age range |      |      |
|--------------------------|-------|------|------|------------------|------|--------|------|-------------|--------------|---------------|----------------------------------|---------|-------|-------------------------------|------|------|
|                          |       |      |      |                  |      |        |      |             |              |               |                                  |         |       | Calibrated<br>age (median)    | min  | max  |
|                          |       |      |      |                  |      |        |      | 0,00        | <b>0,00</b>  |               |                                  |         |       | -63                           |      |      |
| 11289                    | M0059 | A    | 1    | 2                | 112  | 113    | W    | 2,63        | <b>2,84</b>  | 2,84          | molluscs, <i>Abra alba</i>       | 700     | 35    | 405                           | 297  | 513  |
| 11476                    | M0059 | A    | 2    | 2                | 27   | 29     | W    | 5,07        | <b>4,96</b>  | 4,97          | molluscs, <i>Abra alba</i>       | 1265    | 35    | 899                           | 755  | 1043 |
| 11291                    | M0059 | E    | 3    | 2                | 32   | 33     | W    | 8,42        | <b>8,79</b>  | 8,79          | molluscs, <i>Abra alba</i>       | 1585    | 35    | 1213                          | 1083 | 1348 |
| 11292                    | M0059 | A    | 4    | 13.55-13.60 mbsf |      |        | CC   | 13,55       | <b>14,22</b> | 14,24         | molluscs, <i>Macoma balthica</i> | 2740    | 40    | 2556                          | 2383 | 2729 |
| 11477                    | M0059 | D    | 7    | 2                | 133  | 135    | W    | 21,13       | <b>21,13</b> | 21,14         | molluscs, <i>Macoma balthica</i> | 3780    | 35    | 3829                          | 3645 | 4013 |
| 11295                    | M0059 | D    | 8    | 2                | 39   | 40     | W    | 23,49       | <b>23,49</b> | 23,49         | molluscs, <i>Macoma balthica</i> | 4035    | 40    | 4187                          | 3993 | 4381 |
| 11479                    | M0059 | A    | 8    | 2                | 76   | 78     | W    | 25,66       | <b>26,59</b> | 26,60         | molluscs, <i>Macoma balthica</i> | 4395    | 40    | 4664                          | 4500 | 4827 |
| 11297                    | M0059 | A    | 8    | 2                | 120  | 121    | W    | 26,10       | <b>27,03</b> | 27,03         | molluscs, <i>Macoma balthica</i> | 4500    | 40    | 4785                          | 4598 | 4971 |
| 11480                    | M0059 | D    | 9    | 3                | 29   | 31     | W    | 28,19       | <b>28,19</b> | 28,20         | molluscs, <i>Macoma balthica</i> | 4540    | 40    | 4845                          | 4654 | 5036 |
| 11300                    | M0059 | A    | 9    | 1                | 132  | 134    | W    | 28,02       | <b>29,50</b> | 29,51         | molluscs, <i>Macoma balthica</i> | 4780    | 40    | 5147                          | 4949 | 5345 |
| 11481                    | M0059 | D    | 11   | 1                | 28,5 | 30,5   | W    | 31,79       | <b>31,79</b> | 31,80         | molluscs, <i>Macoma balthica</i> | 4890    | 40    | 5313                          | 5118 | 5507 |
| 11482                    | M0059 | D    | 11   | 2                | 104  | 106    | W    | 34,04       | <b>34,04</b> | 34,05         | molluscs, <i>Abra alba</i>       | 5155    | 40    | 5603                          | 5457 | 5748 |
| 11301                    | M0059 | A    | 11   | 2                | 3    | 5      | W    | 34,03       | <b>35,38</b> | 35,39         | molluscs, <i>Abra alba</i>       | 5415    | 40    | 5885                          | 5713 | 6057 |
| 11483                    | M0059 | D    | 12   | 3                | 23   | 25     | W    | 38,03       | <b>38,03</b> | 38,04         | molluscs, <i>Abra alba</i>       | 5770    | 40    | 6289                          | 6152 | 6426 |
| 11303                    | M0059 | D    | 13   | 2                | 15   | 16     | W    | 39,75       | <b>39,75</b> | 39,75         | molluscs, <i>Macoma balthica</i> | 6130    | 40    | 6662                          | 6494 | 6829 |
| 11304                    | M0059 | A    | 15   | 1                | 49   | 51     | W    | 46,99       | <b>48,63</b> | 48,64         | mollusc fragments, bivalve       | 6845    | 45    | 7437                          | 7311 | 7562 |
