# Supplementary material for: Reconstructing Holocene temperature and salinity variations in the western Baltic Sea region: a multi-proxy comparison from the Little Belt (IODP Expedition 347, Site M0059)
Source: Copernicus journal article supplement (doi:10.5194/bg-14-5607-2017), 2017-12-12
Supplement: Supplementary file 8 [file bg-14-5607-2017-supplement.zip]

**Kotthoff et al. 2017 supplements**

Table S5: Turkey-Kramer results for diatom data

| EZ 1 vs 2         | p value | Significant? | EZ 2 vs 3         | p value  | Significant? | EZ 3 vs 4         | p value  | Significant? |
|-------------------|---------|--------------|-------------------|----------|--------------|-------------------|----------|--------------|
| % fresh           | 0,0002  | Yes          | % fresh           | 0,5748   | No           | % fresh           | 0,1188   | No           |
| % brackish-fresh  | 0,0020  | Yes          | % brackish-fresh  | 0,6521   | No           | % brackish-fresh  | 0,9818   | No           |
| % brackish        | 0,0002  | Yes          | % brackish        | 0,0310   | Yes          | % brackish        | 0,9966   | No           |
| % brackish-marine | 0,0050  | Yes          | % brackish-marine | 0,1407   | No           | % brackish-marine | 0,6969   | No           |
| % marine          | 0,0002  | Yes          | % marine          | 0,5044   | No           | % marine          | 0,0993   | No           |
| ADA               | 0,0993  | No           | ADA               | 0,9510   | No           | ADA               | 0,0076   | Yes          |
| CRS               | 0,0243  | Yes          | CRS               | > 0.0001 | Yes          | CRS               | > 0.0001 | Yes          |
| B:P               | 0,0057  | Yes          | B:P               | 0,1698   | No           | B:P               | 0,4215   | No           |
